# Supplementary material for: Characterization of rhinovirus/enterovirus complex infection in children living at high altitudes: A cross sectional study
Source: Research Square preprint supplement (doi:10.21203/rs.3.rs-209076/v1), 2021-02-19
Supplement: Supplementary file 1 [file a531b7a4be23e435e34d7a7d.docx]

**Title Page**

Characterization of *rhinovirus/enterovirus* complex infection in children living at high altitudes: A cross sectional study

Fernández- Sarmiento Jaime, MD PhD (c)1, Corrales Silvia Catalina, MD2, Obando Evelyn, MD3, Amín Jennifer, MD2, Bastidas Goyes Alirio, MD Msc4, Barrera Lopez Pedro A. MD Msc2, Bernal Ortiz Nicolás2

1Department of Pediatrics and Intensive Care, Universidad de La Sabana, Fundación Cardioinfantil-Instituto de Cardiología, Bogotá, Colombia.

2Department of Pediatrics and Intensive Care, Universidad de La Sabana, Fundación Cardioinfantil-Instituto de Cardiología, Bogotá, Colombia.

3Department of Pediatrics and Intensive Care, Instituto Roosvelt and Fundación Santafe de Bogotá, Bogotá, Colombia.

4Research Department, Universidad de La Sabana, Bogotá, Colombia.

1Correspondence: JaimeFe@unisabana.edu.co
Department of Pediatrics and Intensive Care, Fundación Cardioinfantil-Instituto de Cardiología, Universidad de La Sabana, Graduate school, Universidad CES, Campus Universitario del Puente del Común, Km 7 Autopista Norte, Chía, Cundinamarca – Colombia-South America, Bogotá, Colombia

**Supplement 2.** Respiratory support in the study population.

| Respiratory support | | *n* (%) *n=*292 |
| --- | --- | --- |
| Supplemental oxygen | Yes | 232 (79.5) |
| No | 60 (20.5) |
| Mechanical ventilation | | 157 (53.8) |
| Type of respiratory support | Invasive | 71 (24.3) |
| Non-invasive | 11 (3.8) |
| High-flow nasal cannula | 75 (25.7) |
| Conventional nasal cannula | 69 (23.6) |
| Venturi | 6 (2.1) |
